# Supplementary material
Source: ML conference proceedings conference paper supplement (https://openaccess.thecvf.com/content/CVPR2022/html/Otberdout_Sparse_to_Dense_CVPR_2022_paper.html)
Supplement: Supplementary file 1 [file Otberdout_Sparse_to_Dense_CVPR_2022_supplemental.pdf]

# Supplementary material for the paper: Sparse to Dense Dynamic 3D Facial Expression Generation

Naima Otberdout

Univ. Lille, CNRS, Inria, Centrale Lille, UMR 9189 CRIStAL, F-59000 Lille, France

naima.otberdout@univ-lille.fr

Claudio Ferrari

Department of Architecture and Engineering

University of Parma, Italy

claudio.ferrari2@unipr.it

Mohamed Daoudi

IMT Nord Europe, Institut Mines-Télécom, Univ. Lille, Centre for Digital Systems, F-59000 Lille, France

Univ. Lille, CNRS, Centrale Lille, Institut Mines-Télécom, UMR 9189 CRIStAL, F-59000 Lille, France

mohamed.daoudi@imt-nord-europe.fr

Stefano Berretti

Media Integration ad Communication Center

University of Florence, Italy

stefano.berretti@unifi.it

Alberto Del Bimbo

Media Integration ad Communication Center

University of Florence, Italy

alberto.delbimbo@unifi.it

## 1. Landmarks Configuration

In Figure 1 we show, for three different expressions, the configuration of landmarks used to guide the generation of the facial expression.

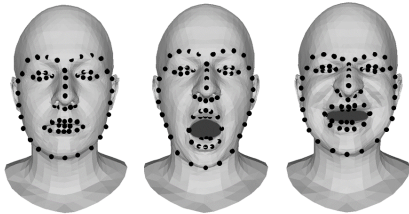

Figure 1. Landmarks configuration used to guide our model.

## 2. Logarithm and Exponential Maps

In order to map the SRVF data forth and back to a tangent space of  $\mathcal{C}$ , we use the logarithm  $\log_p(\cdot)$  and the exponential

$\exp_p(\cdot)$  maps defined in a given point  $p$  by,

$$\begin{aligned} \log_p(q) &= \frac{d_{\mathcal{C}}(q,p)}{\sin(d_{\mathcal{C}}(q,p))} (q - \cos(d_{\mathcal{C}}(q,p))p), \\ \exp_p(s) &= \cos(\|s\|)p + \sin(\|s\|) \frac{s}{\|s\|}, \end{aligned} \quad (1)$$

where  $d_{\mathcal{C}}(q,p) = \cos^{-1}(\langle q,p \rangle)$  is the distance between  $q$  and  $p$  in  $\mathcal{C}$ .

## 3. Architecture of S2D-Dec

The architecture adopted for S2D-Dec is based on the architecture proposed in [1]. S2D-Dec takes as input the displacements of 68 landmarks illustrated in Figure 1. The architecture includes a fully connected layer of size 2688, five spiral convolution layers of 64, 32, 32, 16 and 3 filters. Each spiral convolution layer is followed by an up-sampling by a factor of 4.

## 4. Ablation Study

In this section, we report a visual comparison between reconstructions obtained with the standard L1 loss and our proposed weighted L1. Figure 2 clearly shows the effect of

our introduced weighting scheme that allows for improved expression modeling.

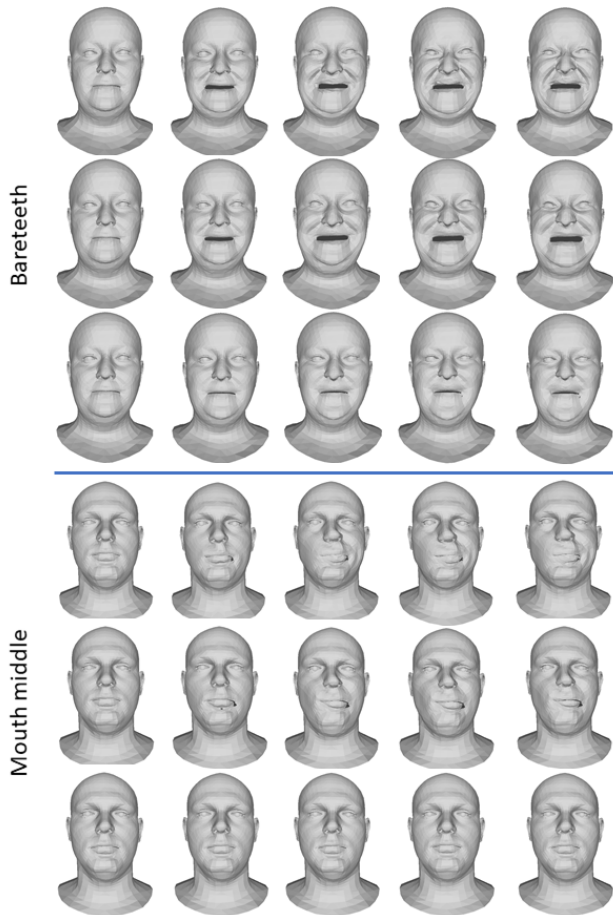

Figure 2. Ablation study: qualitative comparison between ground truth (first row) our model with (second row) and without (last row) weighted loss.

## References

- [1] Giorgos Bouritsas, Sergiy Bokhnyak, Stylianos Ploumpis, Stefanos Zafeiriou, and Michael Bronstein. Neural 3D morphable models: Spiral convolutional networks for 3D shape representation learning and generation. In *IEEE/CVF Int. Conf. on Computer Vision (ICCV)*, pages 7212–7221, 2019.
